# Supplementary material
Source: PubMed Central journal article supplement (PMC3963573)
Supplement: supp_tpc.113.111526_tpc111526Supplemental.pdf [file supp_tpc.113.111526_tpc111526Supplemental.pdf]

```

s61 - gctgagtctgaacaagcttgACGGTGGGAATATTCcctcgagtcagagcgctcg
s11 +   cgacgctctgactcgaggGAATATTCGCTAGCcaagcttgttcagactcagc
s51 -   gctgagtctgaacaagcttgAGGAATATTCGCTGCCcctcgagtcagagcgctcg
z41 +   gctgagtctgaacaagcttgGGAATATTCACACAGCctcgagtcagagcgctcg
z32 -   gctgagtctgaacaagcttgGCGGAATATTCGACCcctcgagtcagagcgctcg
s12 +   cgacgctctgactcgaggGGGAATATTCGTGCGcaagcttgttcagactcagc
z40 +   cgacgctctgactcgaggGAATATACCGCCCTcaagcttgttcagactcagc
s62 -   gctgagtctgaacaagcttgGGGAGGAATATAcGGCCcctcgagtcagagcgctcg
s59 +   cgacgctctgactcgaggGCGGAATATACCCCTACcaagcttgttcagactcagc
z38 +   gctgagtctgaacaagcttgGAGTACCGAATATACcctcgagtcagagcgctcg
s16 +   cgacgctctgactcgaggGGGAATATGCGGTACCcaagcttgttcagactcagc
z83 -gctgagtctgaacaagcttgATTAGACGAATATGcctcgagtcagagcgctcg
s20 +   gctgagtctgaacaagcttgCCCTCACGAATATGcctcgagtcagagcgctcg
s47 -   gctgagtctgaacaagcttgACAGAATATGcctcgagtcagagcgctcg
z82 +   gctgagtctgaacaagcttgGGGAATATCCCATCGcctcgagtcagagcgctcg
z34 -   gctgagtctgaacaagcttgTTTAGCGAATATCCcctcgagtcagagcgctcg
s9 -   gctgagtctgaacaagcttgACCGCAGAATATCCcctcgagtcagagcgctcg
z27 -   gctgagtctgaacaagcttgGTAAGGAATAATCTGCcctcgagtcagagcgctcg
z77 -   gctgagtctgaacaagcttgAGAATAATCCCGATAcctcgagtcagagcgctcg
z29 -   cgacgctctgactcgaggGAATAATTATGCTGcaagcttgttcagactcagc
z24 -   cgacgctctgactcgaggGACGAATAATTCCTcaagcttgttcagactcagc
s58 +   gctgagtctgaacaagcttgGGGAATAATGAGTCCcctcgagtcagagcgctcg
z36 +   cgacgctctgactcgaggCGAATAATGCACTATGcaagcttgttcagactcagc
s14 -   gctgagtctgaacaagcttgCCAGAGAATAATGCCcctcgagtcagagcgctcg
s46 -   gctgagtctgaacaagcttgGAATAGGGAATAACCGcctcgagtcagagcgctcg
s3 -   gctgagtctgaacaagcttgAAGAATAACCCAGTGCcctcgagtcagagcgctcg
s17 -   gctgagtctgaacaagcttgGAATAACGTAACCGCCcctcgagtcagagcgctcg
z42 -   cgacgctctgactcgaggGAATAAACGTACTAcaagcttgttcagactcagc
s6 -   gctgagtctgaacaagcttgAGGAATAACACGGGCcctcgagtcagagcgctcg
s49 -   gctgagtctgaacaagcttgGGAATAAACGTCGCCcctcgagtcagagcgctcg
z33 -   gctgagtctgaacaagcttgTGCGAGAATAAGTCGCcctcgagtcagagcgctcg
z39 +   gctgagtctgaacaagcttgAGAATATCAGCTGTACcctcgagtcagagcgctcg
s60 +   cgacgctctgactcgaggGGAATAATCCGTCCGGTcaagcttgttcagactcagc
s52 -   cgacgctctgactcgaggGGATAATCTGTGTcaagcttgttcagactcagc
s63 +   cgacgctctgactcgaggGGATATCCGTGGTGTcaagcttgttcagactcagc
s5 -   cgacgctctgactcgaggGATAATTCGGGACCCcaagcttgttcagactcagc
s44 +   cgacgctctgactcgaggCCGGATATCGGAATGTcaagcttgttcagactcagc
z81 -   gctgagtctgaacaagcttgGCATAATACAGAATAcctcgagtcagagcgctcg
s22 -   cgacgctctgactcgaggGCATAATTACCGTCCcaagcttgttcagactcagc
z26 +   tgacgctctgactcgaggGCATATAATTATACcaagcttgttcagactcagc
s21 -   gctgagtctgaacaagcttgACAACGCATAAAGGGCctcgagtcagagcgctcg
z30 +   cgacgctctgactcgaggCAAGTATATTATGGTcaagcttgttcagactcagc
z75 -   cgacgctctgactcgaggGAATGTTCTTCCAGTcaagcttgttcagactcagc
s15 -   cgacgctctgactcgaggCGGAATGTTCTTCTGcCaagcttgttcagactcagc
s43 -   gctgagtctgaacaagcttgAAGAATGTTCTCGGGCctcgagtcagagcgctcg
z28 +   gctgagtctgaacaagcttgAAA GAATGTGCGCAGGcctcgagtcagagcgctcg
s8 -   cgacgctctgactcgaggGGACAATCGAATGTGcaagcttgttcagactcagc
z25 -   cgacgctctgactcgaggGAATGATATAGCGGcaagcttgttcagactcagc
z37 -   gctgagtctgaacaagcttgGAATTAATATGTCCGcctcgagtcagagcgctcg
s18 +   gctgagtctgaacaagcttgGTATTACTCAATTCcctcgagtcagagcgctcg
consensus      GnATdw

```

**Supplemental Figure 1: Alignment of 50 sequences obtained from PCR-assisted binding site selection.** The DNA sequences of fifty unique clones derived from two independent PCR-assisted binding site selection experiments were manually aligned to identify the consensus DNA binding site. Each oligonucleotide contained at least one instance of GNATDW (where N is any nucleotide, D is A, G, or T, and W is A or T) and 28 oligonucleotides contained a second potential binding site. S indicates clones from DNA EMSA selection, Z indicates clones from protein EMSA selection; + & - the clone orientation. Consensus GAATAW sites are red and complementary (often overlapping) WTATTC sites are orange except where they overlap with red nucleotides.

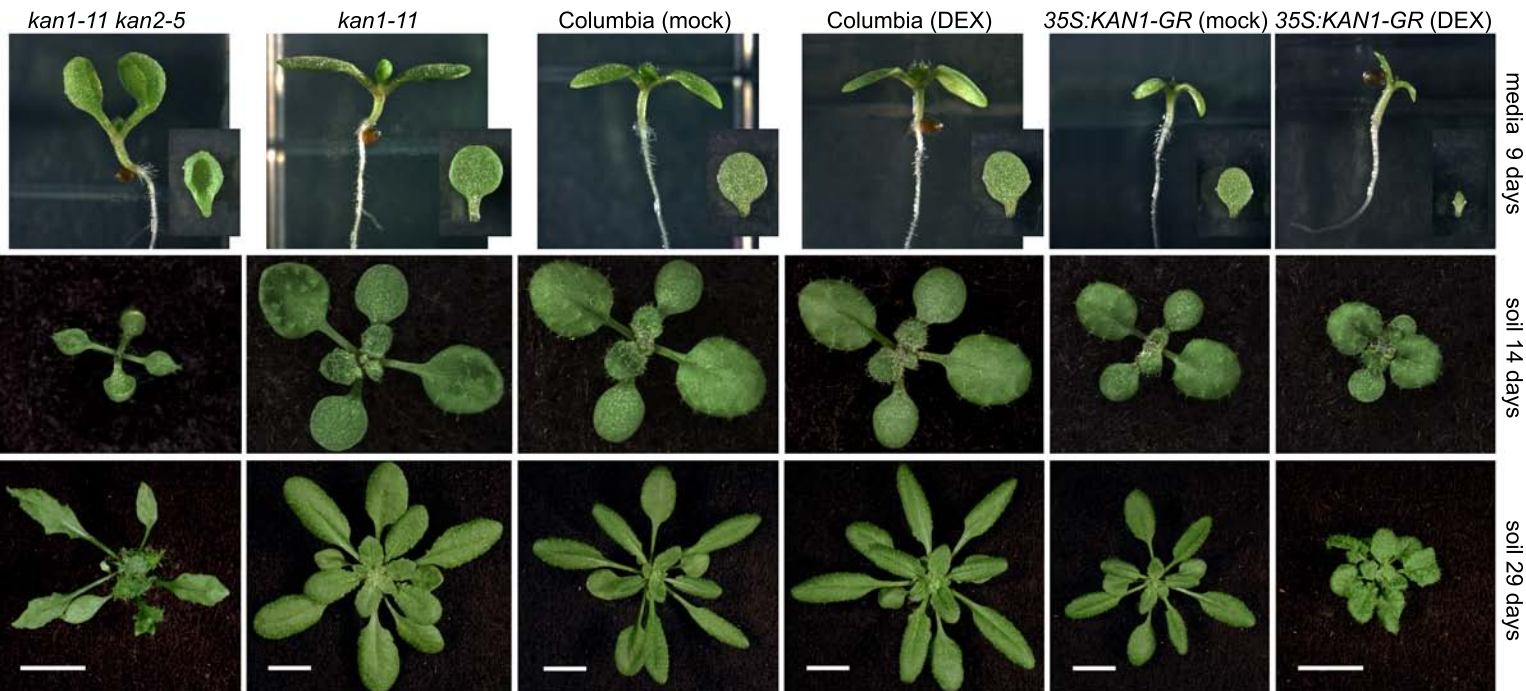

**Supplemental Figure 2: Table of phenotypes in loss of function mutants and post-translationally activated *KAN-GR* plants.** Top row, *kan1-11*, *kan1-11 kan2-5*, wild-type (Col), and *KAN-GR* seeds were germinated and grown for 9 days on media containing mock or DEX supplementation (as indicated). Cotyledons (inset photos, first row) of *kan1-11 kan2-5* are strongly cupped and DEX-treated *KAN1-GR* cotyledons are narrow and pointed in contrast to Col or mock-treated *KAN-GR* seedlings that form normal cotyledons and first leaves. Intermittent DEX application has different effects on morphogenesis of soil-grown *KAN-GR* plants than continuous exposure in media. Whole 14-day old (second row) and 29-day old (third row) rosettes display effects of loss of *kan* function and ectopic expression of *KAN-GR*. Soil-grown DEX-treated *KAN-GR* plants formed leaves with short petioles and asymmetric leaf blades, which were not observed in mock-treated plants. (Bar = 1 cm)

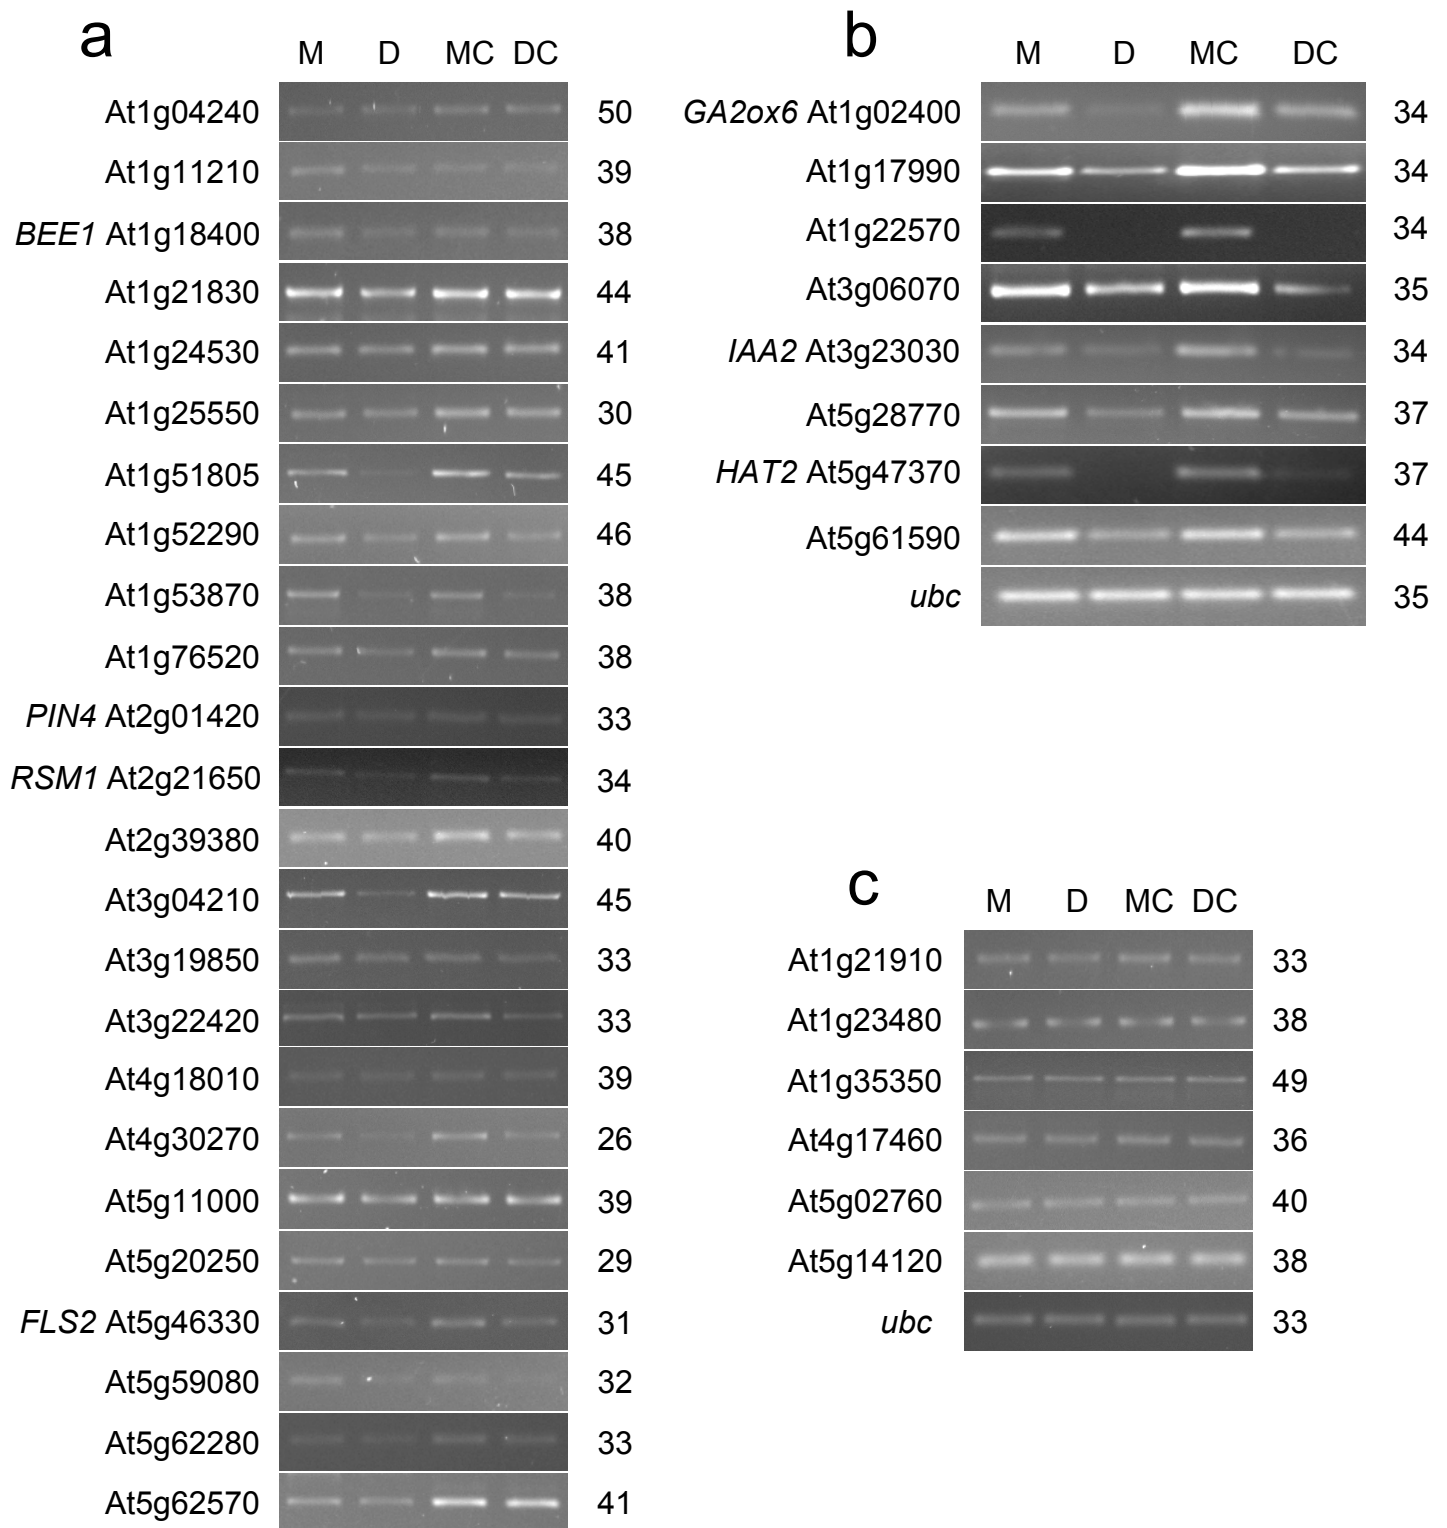

Supplemental Figure 3: Expression of candidate KAN1 target genes was confirmed using RT PCR at limiting numbers of cycles. Reverse-transcription PCR was used to confirm microarray results for select candidate KANT genes. Most putative KANT genes displayed reduced expression in DEX (D) and DEX+CHX (DC) compared to mock (M) and mock+CHX (MC) treated seedlings (a and b). A few genes showed no detectable expression differences (c) in RT-PCR and may represent false discovery. For each template-primer combination, the number of PCR cycles was determined empirically and is shown to the right of each gel image. At least two biological replicates and two technical replicates were performed and a single representative gel image is shown.

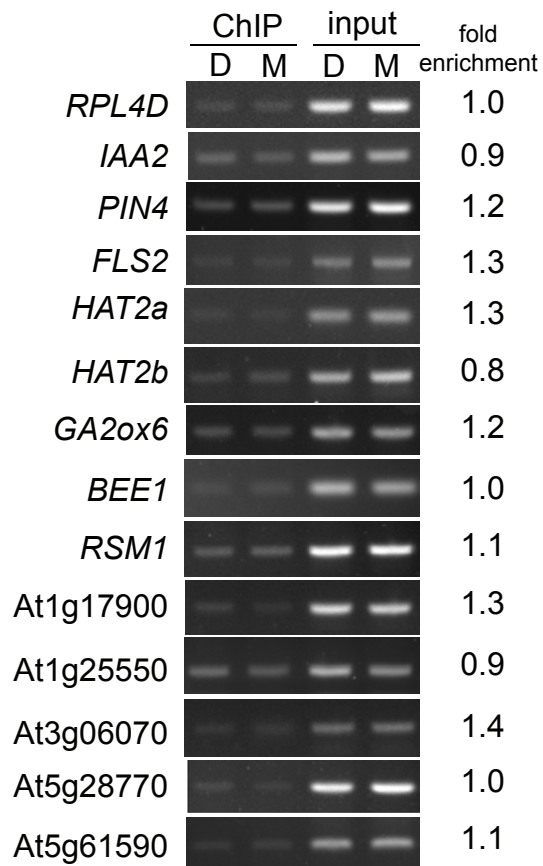

Supplemental Figure 4: Chromatin immunoprecipitation experiments on mock- and DEX-treated Col seedlings reveal no enrichment. ChIP was performed on Col seedlings lacking the KAN-GR transgene as a control for potential non-specific immunoprecipitation effects. None of the promoter fragments tested showed enrichment in DEX- versus mock-treated Col samples indicating that enrichment depends on the KAN-GR transgene. Fold enrichment was calculated as in Fig. 5.

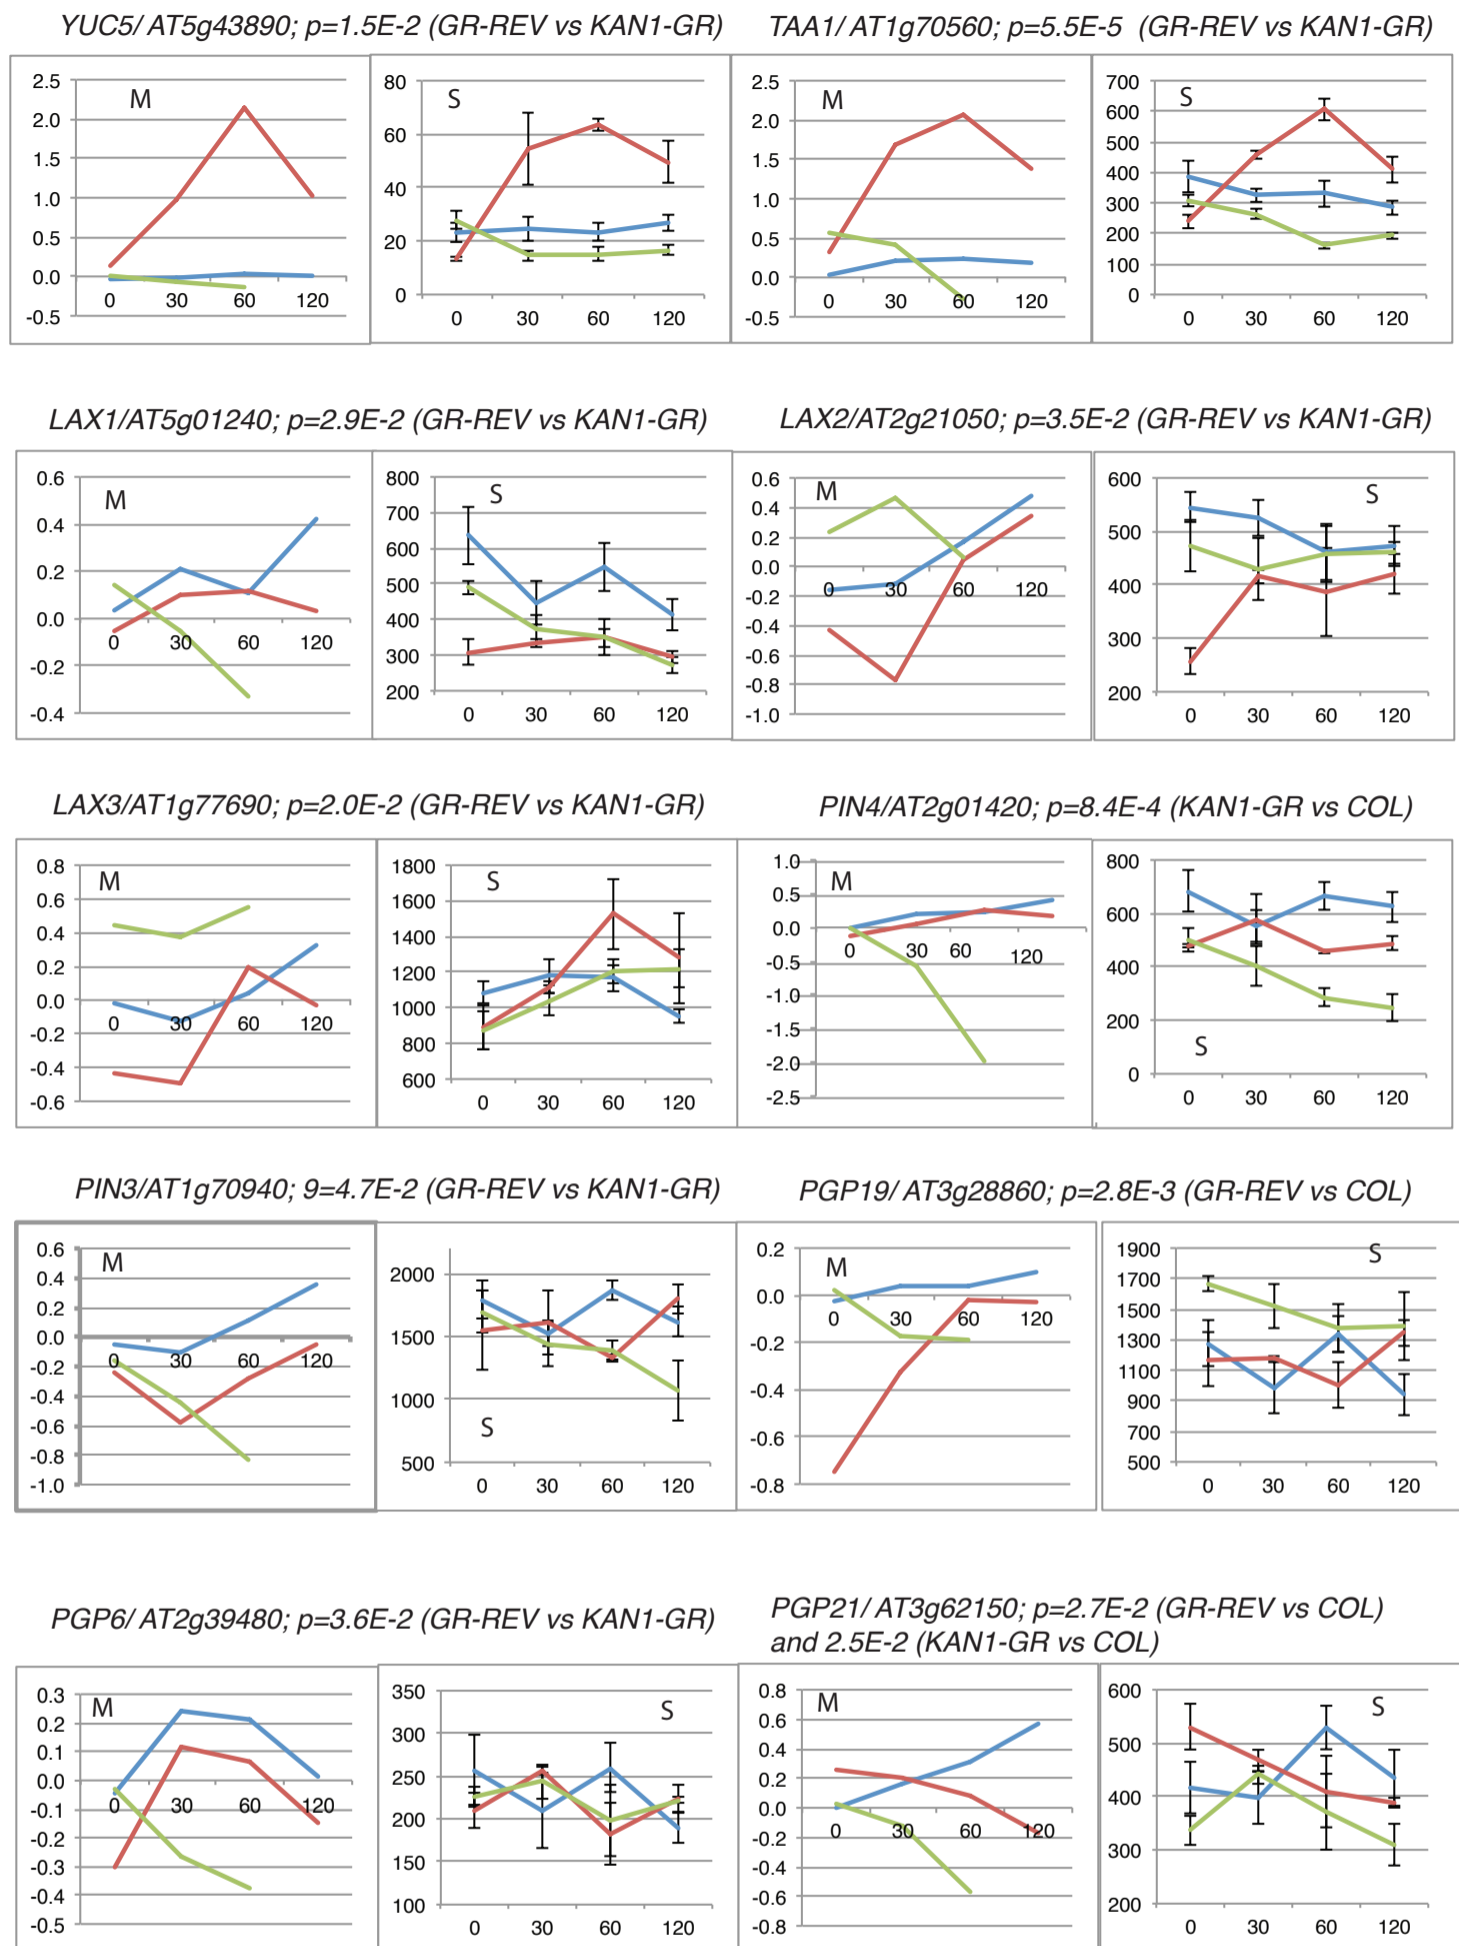

Supplemental Figure 5: Transcript levels for Arabidopsis genes encoding auxin biosynthetic enzymes (YUC5 and TAA1) and auxin transporters in response to DEX treatment of GR-REV and KAN1-GR transgenic plants. M: transcript levels measured by microarray, Y-axis: Normalized transcript levels  $\log(2)$ . X-axis: time after treatment in minutes. S: transcript levels measured by RNA-SEQ, Y-axis: normalized counts, X-axis: time after treatment in minutes. Microarray measurements and P-values (genotype by treatment interaction, adjusted for multiple hypothesis testing) are from Reinhart et al. (2013). GR-REV - red; KAN1-GR - green; Wild-type Columbia - blue. Error bars are standard error of the mean. In all cases, wild type data points are based on 6 biological replicates. Data points for transgenics are based on 3 biological replicates except GR-REV 30 minutes which is based on two biological replicates.

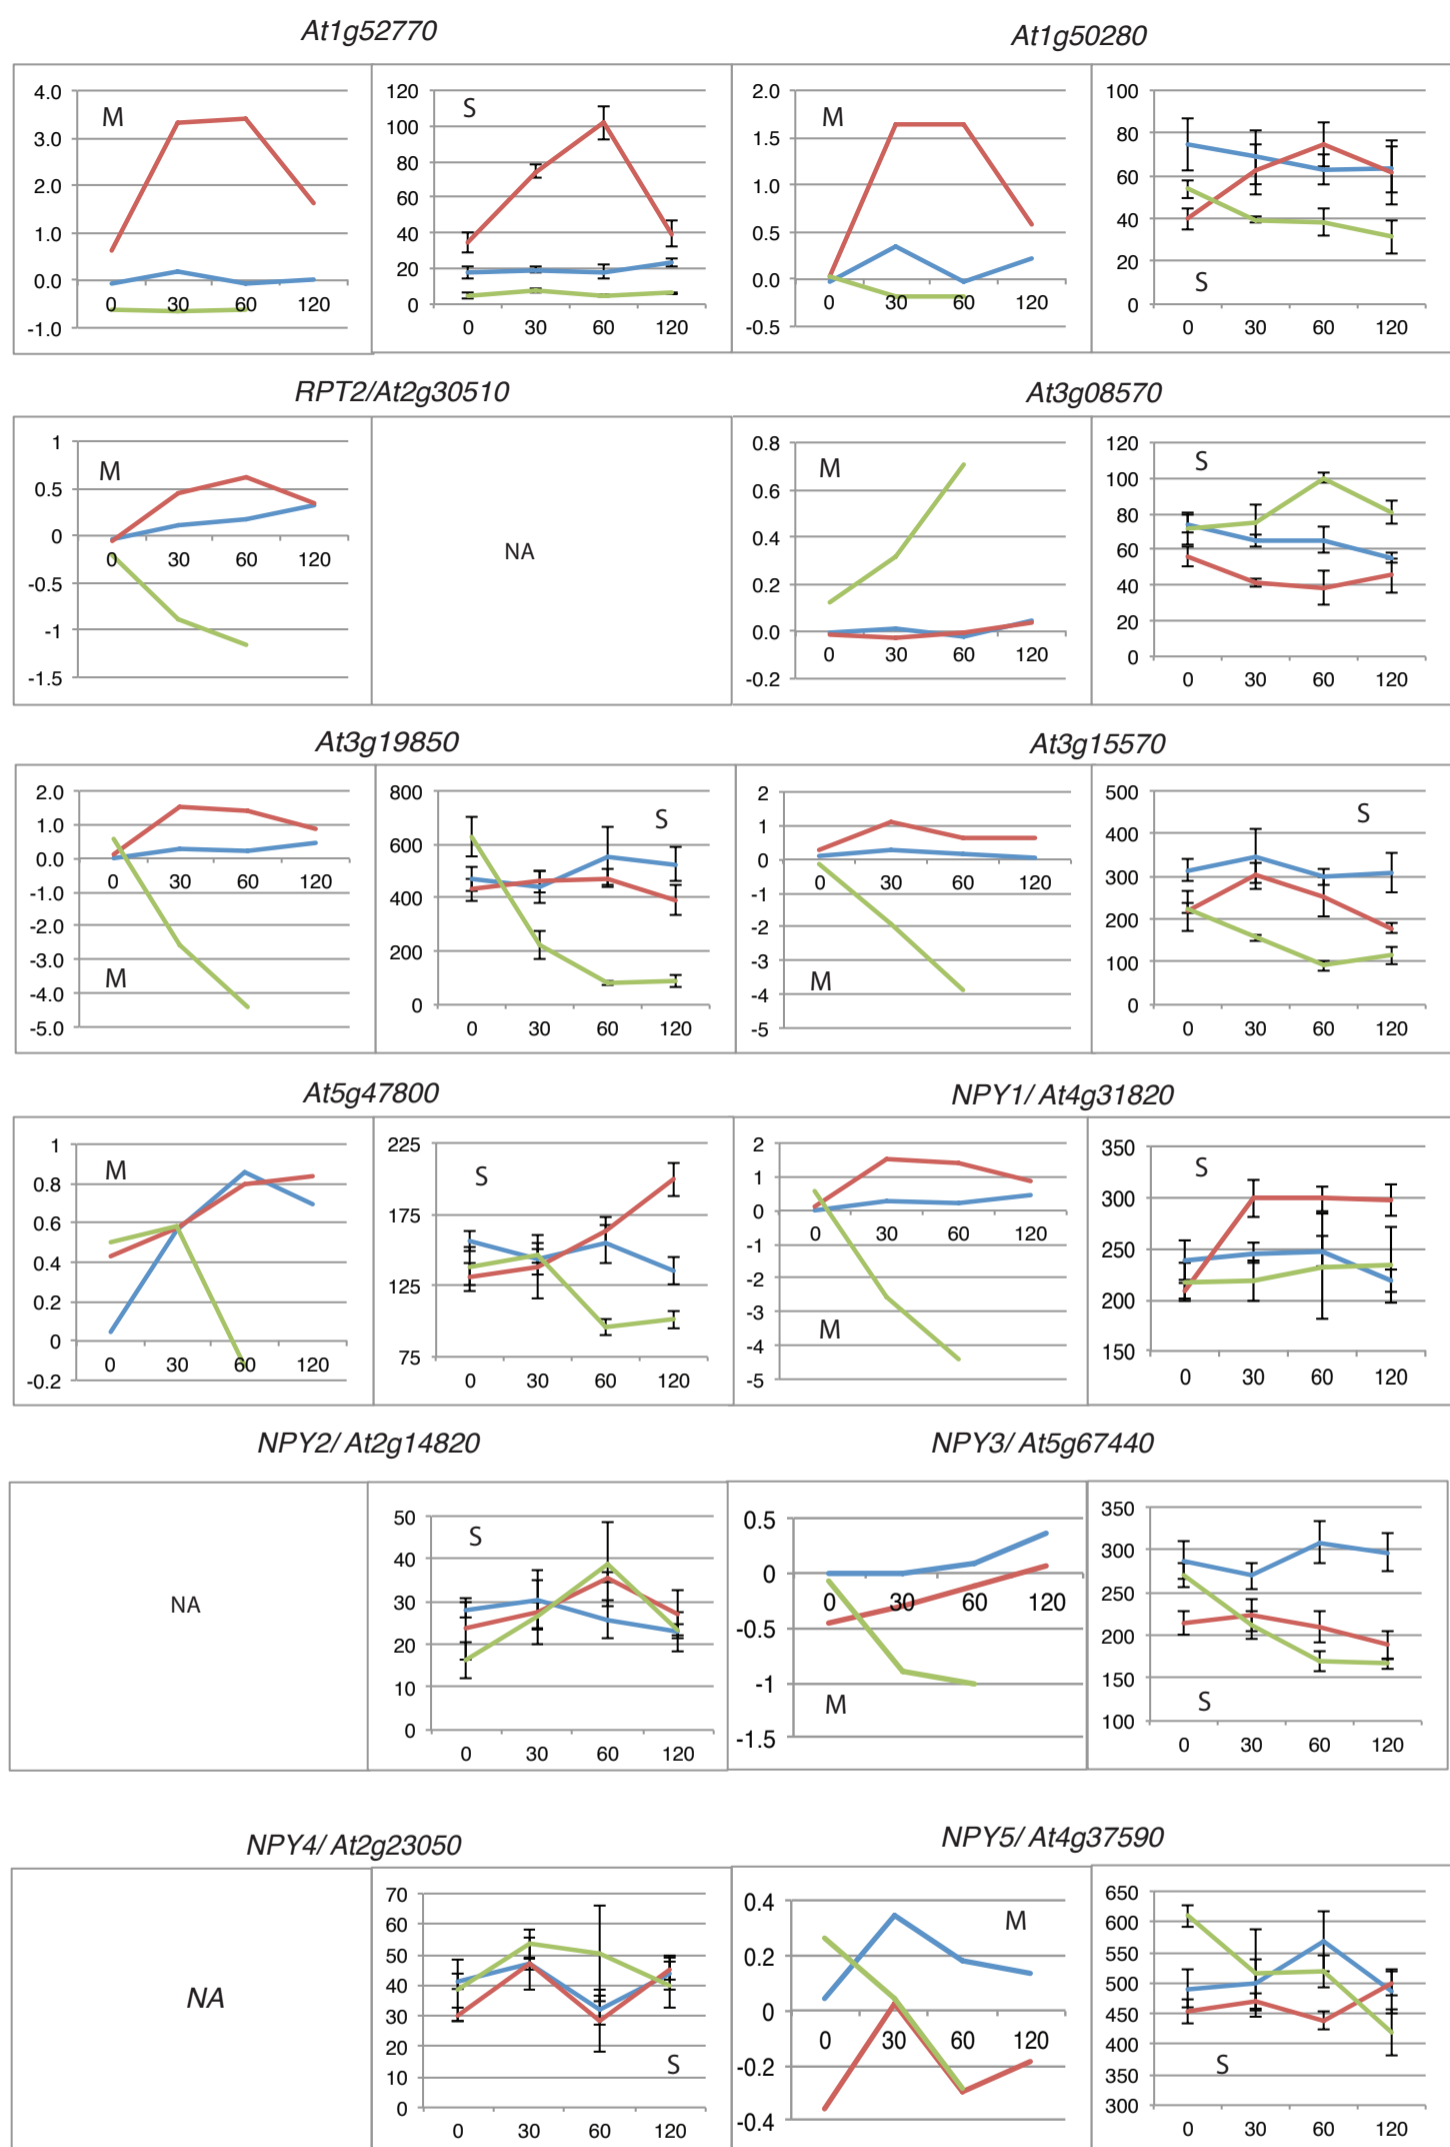

Supplemental Figure 6: Transcript levels for Arabidopsis genes encoding members of the NPH3 family of BTB-POZ domain proteins in response to DEX treatment of GR-REV and KAN1-GR transgenic plants. M: transcript levels measured by microarray, Y-axis: Normalized transcript levels  $\log_2$ . X-axis: time after treatment in minutes.

S: transcript levels measured by RNA-SEQ, Y-axis: normalized counts, X-axis: time after treatment in minutes. Microarray measurements and P-values (genotype by treatment interaction, adjusted for multiple hypothesis testing) are from Reinhart et al. (2013). GR-REV - red; KAN1-GR - green; Wild-type Columbia - blue. Error bars are standard error of the mean. In all cases, wild type data points are based on 6 biological replicates. Data points for transgenics are based on 3 biological replicates except GR-REV 30 minutes which is based on two biological replicates.

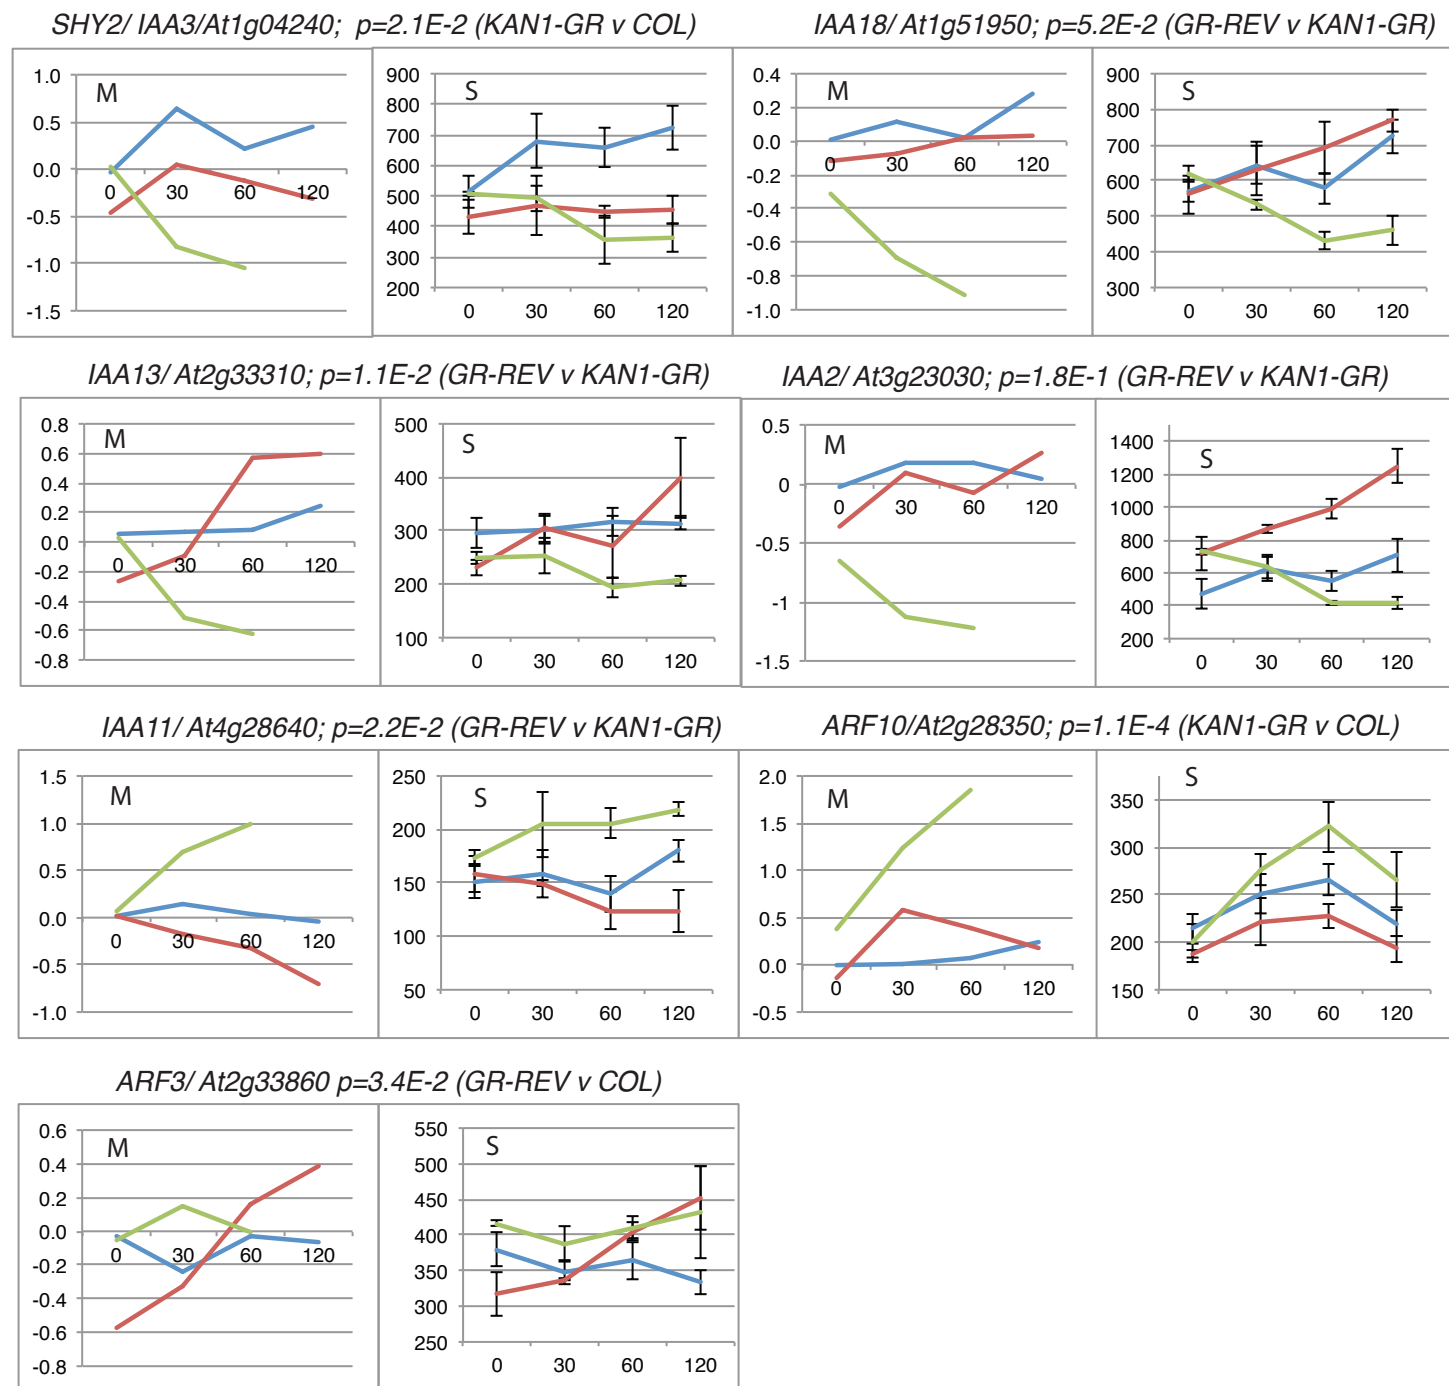

Supplemental Figure 7: Transcript levels for Arabidopsis genes encoding auxin responsive transcriptional regulators. M: transcript levels measured by microarray, Y-axis: Normalized transcript levels  $\log(2)$ . X-axis: time after treatment in minutes. S: transcript levels measured by RNA-SEQ, Y-axis: normalized counts, X-axis: time after treatment in minutes. Microarray measurements and P-values (genotype by treatment interaction, adjusted for multiple hypothesis testing) are from Reinhart et al. (2013). GR-REV - red; KAN1-GR - green; Wild-type Columbia - blue. Error bars are standard error of the mean. In all cases, wild type data points are based on 6 biological replicates. Data points for transgenics are based on 3 biological replicates except GR-REV 30 minutes which is based on two biological replicates.

## ***IAA2* Expression**

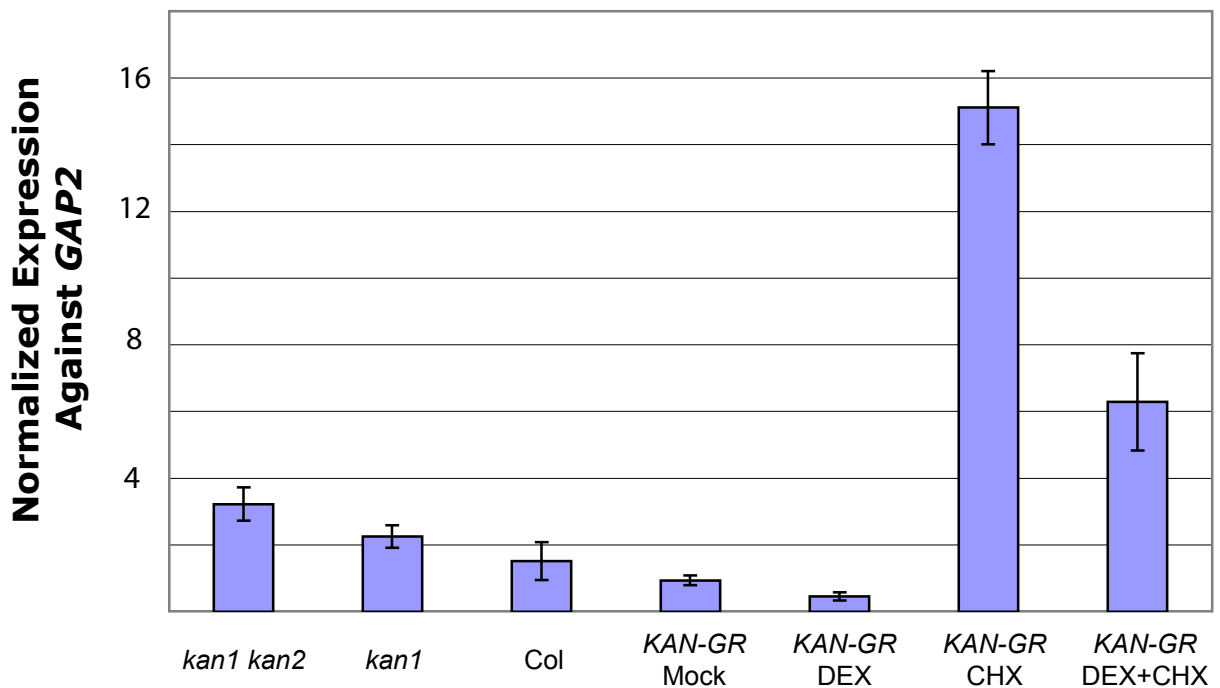

Supplemental Figure 8: IAA2 expression is up-regulated in loss-of-function kan mutants and down-regulated in posttranslationally activated KAN-GR. Quantitative RT-PCR was used to assay expression levels of IAA2 in the following genotypes: *kan1-11 kan2-5*, *kan1-11*, wild-type (Col), and KAN-GR treated with mock- or DEX in the absence and presence of CHX. Results were normalized to GAP2 with the results of KAN-GR mock arbitrarily set to 1. Error bars are standard errors of the mean.



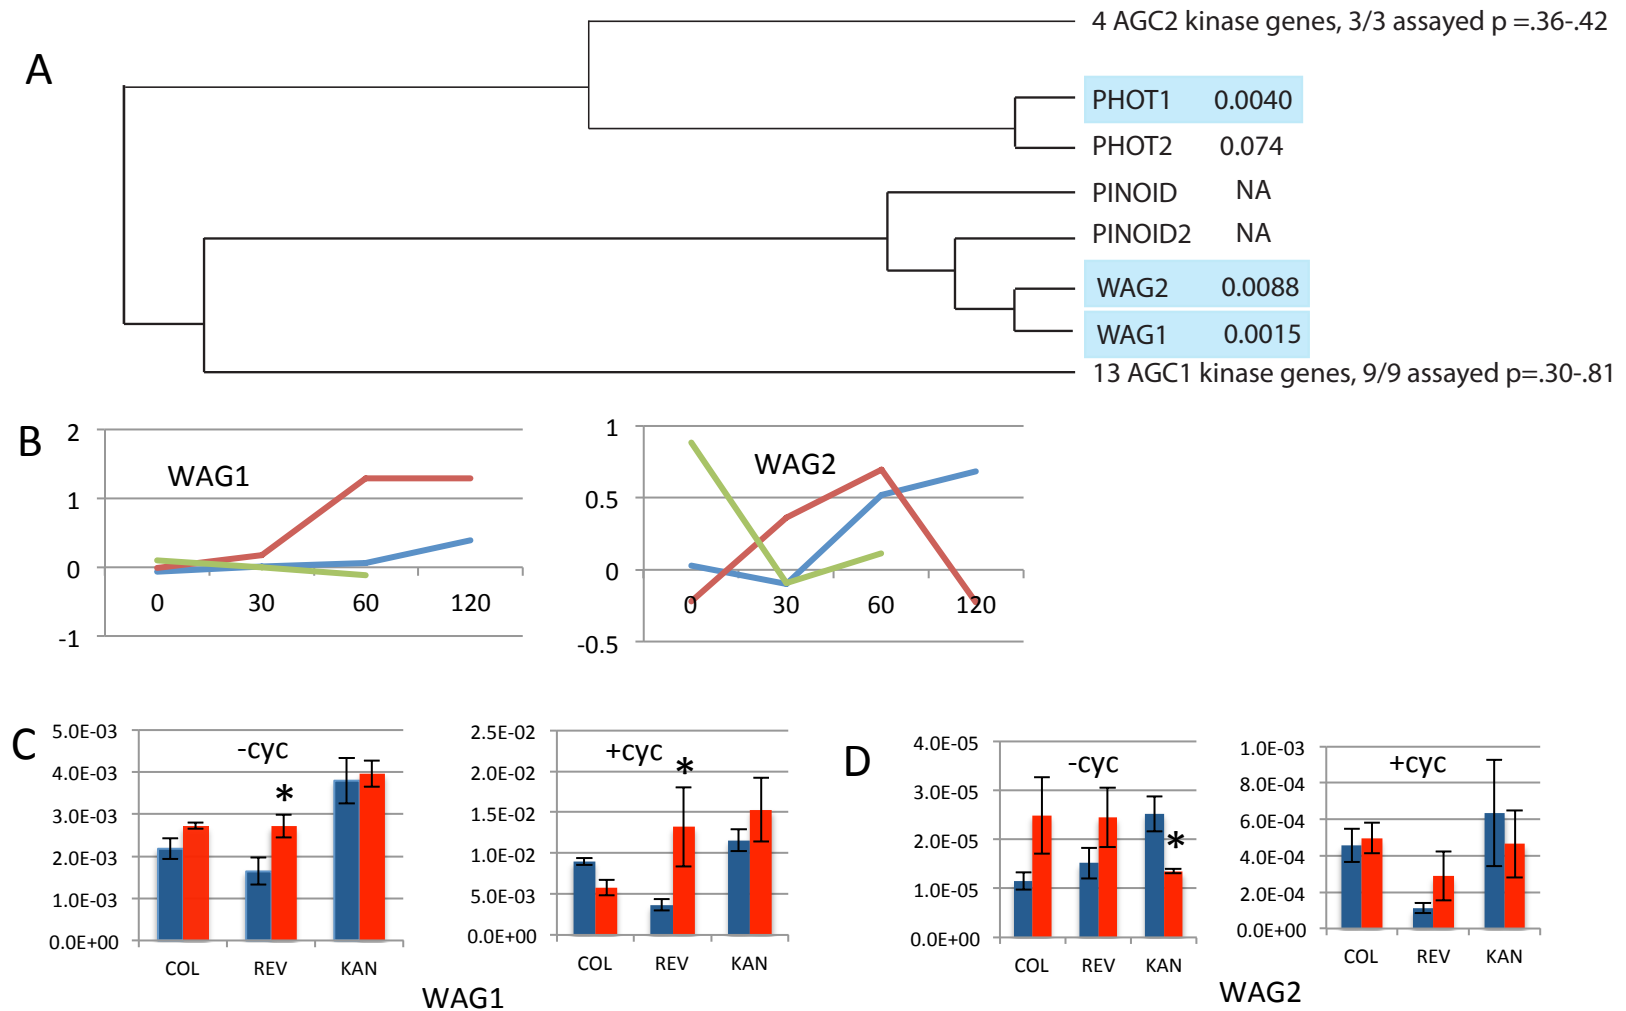

**Supplemental Figure 9. Differential regulation of members of the AGC3 gene family by REVOLUTA and KANADI A.**

Phylogenetic tree of AGC3 kinases (after Bögre et al., 2003). Values are probabilities for interaction between genotype and time of treatment in a 2 way ANOVA comparing GR-REVOLUTA lines treated with dexamethasone to KANADI1-GR lines treated with dexamethasone. **B.** Graphs of transcript levels for wild-type (blue); GR-REVOLUTA (red) and KANADI1-GR (green) lines treated with dexamethasone. Y axis = normalized transcript levels (log base 2). X axis = time in minutes after dexamethasone treatment. **C.** Q-RT-PCR experiments on cDNAs made from mock (blue) and dexamethasone treated (red) seedlings for one hour in the presence and absence of cycloheximide (REV=GR-REV; KAN=KAN1-GR). Three biological replicates were tested for each bar. Asterisk shows values that are different from untreated control at p<.05 (t test). Error bars are standard errors of the mean.

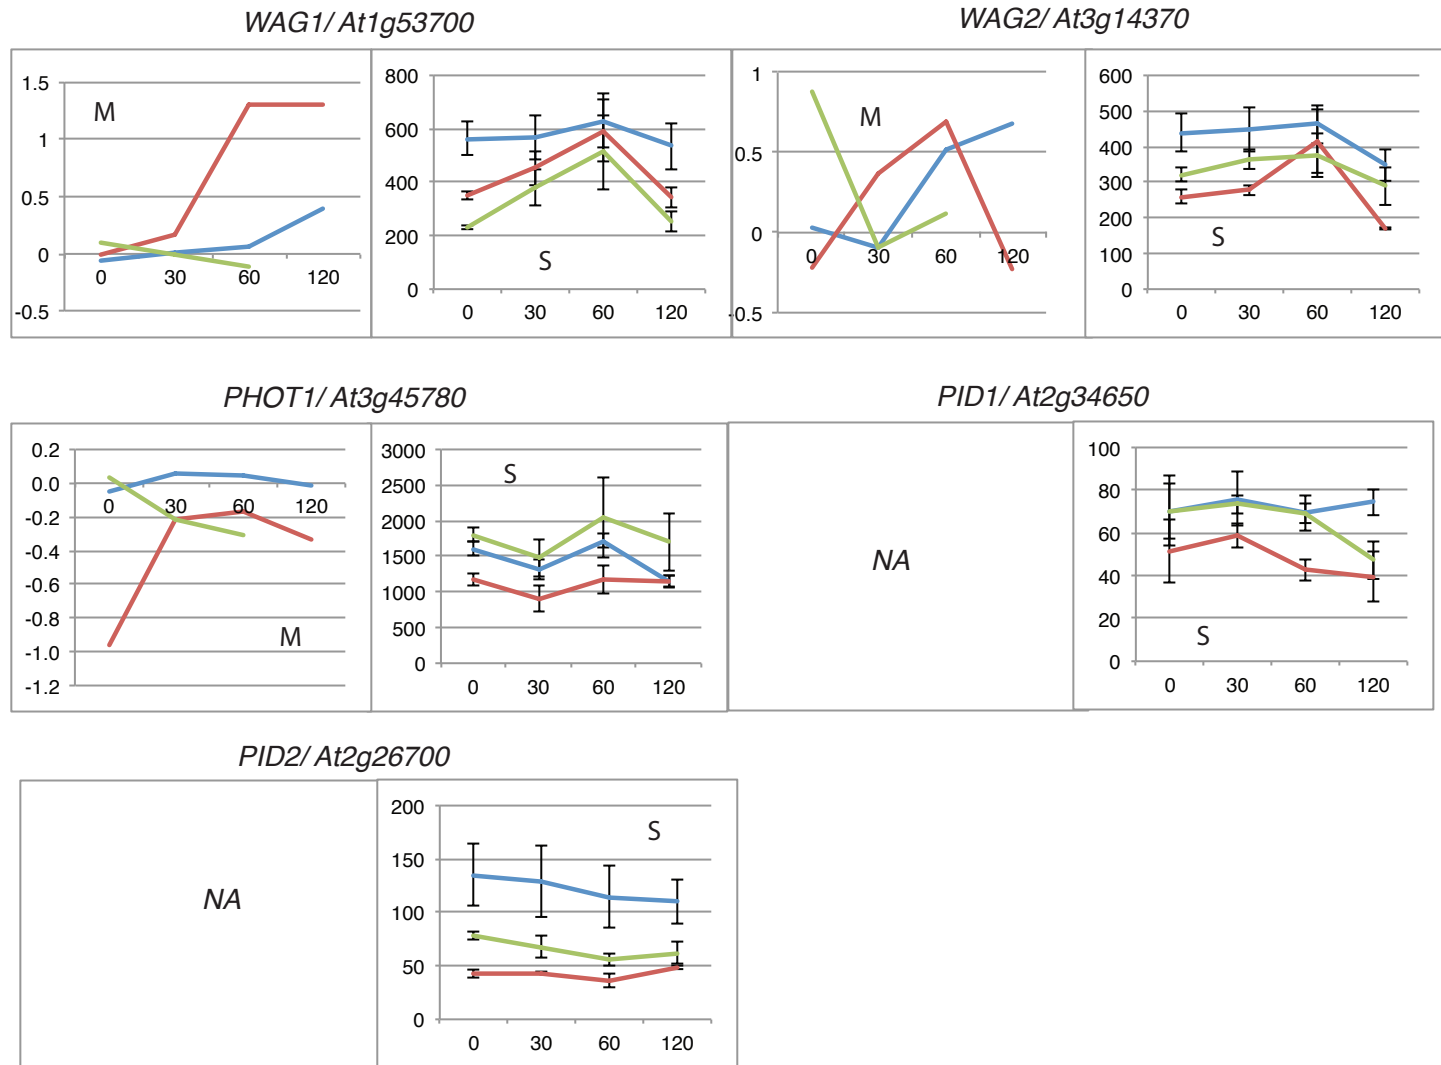

Supplemental Figure 10: Transcript levels for Arabidopsis genes encoding AGC kinases in response to DEX treatment of GR-REV and KAN1-GR transgenic plants. M: transcript levels measured by microarray, Y-axis: Normalized transcript levels  $\log_2$ . X-axis: time after treatment in minutes. S: transcript levels measured by RNA-SEQ, Y-axis: normalized counts, X-axis: time after treatment in minutes. Microarray measurements and P-values (genotype by treatment interaction, adjusted for multiple hypothesis testing) are from Reinhart et al. (2013). GR-REV - red; KAN1-GR - green; Wild-type Columbia - blue. Error bars are standard error of the mean. In all cases, wild type data points are based on 6 biological replicates. Data points for transgenics are based on 3 biological replicates except GR-REV 30 minutes which is based on two biological replicates.

**Supplemental Table 1. Fold enrichment (1) in KAN1-GR CHIP experiment**

| <b>Gene (2)</b>  | <b>Exp1</b> | <b>Exp2</b> | <b>Mean</b> |
|------------------|-------------|-------------|-------------|
| <b>RPL4D</b>     | 0.78        | 1.11        | 0.95        |
| <b>IAA2</b>      | 3.21        | 3.33        | 3.27        |
| <b>PIN4</b>      | 4.29        | 3.46        | 3.87        |
| <b>FLS2</b>      | 4.47        | 3.81        | 4.14        |
| <b>HAT2a</b>     | 0.90        | 1.06        | 0.98        |
| <b>HAT2b</b>     | 2.80        | 2.63        | 2.71        |
| <b>GA2ox6</b>    | 3.81        | 2.70        | 3.25        |
| <b>BEE1</b>      | 4.38        | 4.44        | 4.41        |
| <b>AtRL2</b>     | 3.61        | 2.66        | 3.14        |
| <b>At1g17990</b> | 3.22        | 2.98        | 3.10        |
| <b>At1g25550</b> | 3.12        | 3.03        | 3.07        |
| <b>At3g06070</b> | 2.99        | 2.68        | 2.84        |
| <b>At5g28770</b> | 3.44        | 2.97        | 3.20        |
| <b>At5g61590</b> | 5.14        | 4.04        | 4.59        |

(1) Fold enrichment was calculated by normalizing PCR product intensities to a negative control, the RIBOSOMAL PROTEIN L4D (RPL4D) coding region, followed by calculating the ratio DEX IP/input to mock IP/input.

(2) Gene adjacent to KAN1 binding site. See Figure 5 for position of KAN1 binding sites and PCR fragments amplified.

Supplemental Table 2. Auxin regulated genes by REV and KAN.

| Gene Title                                        | Transcript ID(Array Design) | Probe Set ID | Corrected p-value(Time-Genotype)GR-REV vs KAN1-GR | Corrected p-value(Time-Genotype)GR-REV vs COL | Corrected p-value(Time-Genotype)KAN1-GR vs COL | [0min, (normal GRKAN) (ized) | [0min, (normal GRREV) (ized) | [30min, (normal GRKAN) (ized) | [30min, (normal GRREV) (ized) | [60min, (normal GRKAN) (ized) | [60min, (normal GRREV) (ized) |
|---------------------------------------------------|-----------------------------|--------------|---------------------------------------------------|-----------------------------------------------|------------------------------------------------|------------------------------|------------------------------|-------------------------------|-------------------------------|-------------------------------|-------------------------------|
| <b>AUXIN BIOSYNTHETIC ENZYME GENES</b>            |                             |              |                                                   |                                               |                                                |                              |                              |                               |                               |                               |                               |
| YUCCA8                                            | AT4G28720                   | 253794_at    | 4.48E-01                                          | 5.34E-01                                      | 6.98E-01                                       | -0.3168                      | -0.3397                      | -0.2312                       | -0.1345                       | -0.3803                       | -0.0059                       |
| YUCCA5                                            | At5g43890                   | 249094_at    | 1.54E-02                                          | 1.06E-02                                      | 8.41E-01                                       | 0.0139                       | 0.1363                       | -0.0734                       | 0.9701                        | -0.1355                       | 2.1363                        |
| TAA1                                              | AT1G70560                   | 260364_at    | 5.47E-05                                          | 6.34E-03                                      | 7.49E-02                                       | 0.5605                       | 0.3232                       | 0.4108                        | 1.6899                        | -0.2738                       | 2.0675                        |
| TAR2                                              | AT4G24670                   | 254125_at    | 7.82E-02                                          | 3.88E-01                                      | 3.96E-01                                       | 0.1358                       | -0.4146                      | -0.1180                       | -0.2069                       | -0.3463                       | 0.2226                        |
| <b>AUX1 FAMILY OF INFLUX TRANSPORTERS</b>         |                             |              |                                                   |                                               |                                                |                              |                              |                               |                               |                               |                               |
| LAX1                                              | AT5G01240                   | 251133_at    | 2.91E-02                                          | 5.42E-01                                      | 1.43E-01                                       | 0.1392                       | -0.0552                      | -0.0500                       | 0.0986                        | -0.3296                       | 0.1188                        |
| AUX1                                              | At2g38120                   | 267092_at    | 1.75E-01                                          | 9.60E-01                                      | 3.24E-01                                       | 0.1598                       | -0.4130                      | -0.0231                       | -0.4080                       | -0.1177                       | -0.1442                       |
| LAX2                                              | AT2G21050                   | 264025_at    | 3.53E-02                                          | 8.90E-01                                      | 7.57E-01                                       | 0.2358                       | -0.4321                      | 0.4590                        | -0.7699                       | 0.0623                        | 0.0489                        |
| LAX3                                              | AT1G77690                   | 259680_at    | 2.03E-02                                          | 3.10E-01                                      | 9.91E-01                                       | 0.4441                       | -0.4347                      | 0.3737                        | -0.4968                       | 0.5542                        | 0.1901                        |
| <b>PIN FAMILY OF AUXIN TRANSPORT FACILITATORS</b> |                             |              |                                                   |                                               |                                                |                              |                              |                               |                               |                               |                               |
| PIN7                                              | At1g23080                   | 264900_at    | 8.14E-02                                          | 3.85E-01                                      | 5.27E-01                                       | 0.3428                       | -0.4238                      | 0.1547                        | -0.0719                       | 0.3054                        | 0.1650                        |
| PIN3                                              | At1g70940                   | 262263_at    | 4.69E-02                                          | 8.73E-01                                      | 1.26E-01                                       | -0.1640                      | -0.2339                      | -0.4424                       | -0.5820                       | -0.8321                       | -0.2833                       |
| PIN1                                              | At1g73590                   | 259845_at    | 4.12E-01                                          | 9.36E-01                                      | 8.63E-01                                       | 0.1173                       | 0.0852                       | 0.1713                        | -0.2966                       | 0.0269                        | -0.1288                       |
| PIN4                                              | At2g01420                   | 266300_at    | 5.12E-04                                          | 9.65E-01                                      | 8.43E-04                                       | -0.0001                      | -0.1373                      | -0.5678                       | 0.0545                        | -1.9815                       | 0.2473                        |
| PIN2                                              | At5g57090                   | 247947_at    | 7.52E-01                                          | 9.05E-01                                      | 9.32E-01                                       | 0.5659                       | -0.3895                      | 0.6134                        | -0.7129                       | 0.6710                        | -0.2834                       |
| <b>PGP FAMILY OF AUXIN TRANSPORT FACILITATORS</b> |                             |              |                                                   |                                               |                                                |                              |                              |                               |                               |                               |                               |
| PGP1                                              | AT2G36910                   | 263865_at    | 4.40E-01                                          | 3.49E-01                                      | 7.22E-01                                       | -0.0134                      | 0.1452                       | -0.0159                       | -0.0785                       | 0.3653                        | 0.0622                        |
| PGP2                                              | AT4G25960                   | 254034_at    | 8.33E-02                                          | 8.98E-01                                      | 6.07E-02                                       | 0.0983                       | -0.0576                      | -0.3446                       | -0.1781                       | -0.5291                       | 0.1334                        |
| PGP4                                              | AT2G47000                   | 266752_at    | 5.57E-01                                          | 9.05E-01                                      | 9.97E-01                                       | 0.1921                       | -0.9628                      | 0.0142                        | -1.1064                       | 0.3611                        | -1.1427                       |
| PGP6                                              | At2g39480                   | 266964_at    | 3.62E-02                                          | 9.69E-01                                      | 1.46E-01                                       | -0.0339                      | -0.3023                      | -0.2666                       | 0.1142                        | -0.3767                       | 0.0661                        |
| PGP9                                              | At4g18050                   | 254710_at    | 9.32E-01                                          | 7.03E-01                                      | 9.37E-01                                       | -0.0845                      | -0.1996                      | -0.1003                       | -0.1509                       | 0.0125                        | -0.0269                       |
| PGP14                                             | AT1G28010                   | 259579_at    | 3.43E-01                                          | 8.98E-01                                      | 6.85E-01                                       | -0.5969                      | -0.2826                      | -0.0531                       | -0.1606                       | 0.0696                        | -0.2358                       |
| PGP19                                             | AT3G28860                   | 257137_at    | 1.59E-02                                          | 2.75E-03                                      | 4.53E-01                                       | 0.0224                       | -0.7476                      | -0.1699                       | -0.3245                       | -0.1889                       | -0.0231                       |
| PGP20                                             | AT3G55320                   | 251781_at    | 2.44E-01                                          | 9.67E-01                                      | 5.30E-01                                       | -0.0833                      | -0.3177                      | -0.2921                       | 0.1280                        | -0.0657                       | -0.2181                       |
| PGP21                                             | At3g62150                   | 251248_at    | 2.64E-01                                          | 2.73E-02                                      | 2.48E-02                                       | 0.0267                       | 0.2530                       | -0.1189                       | 0.2052                        | -0.5718                       | 0.0757                        |
| <b>NPH3 like BTB-POZ domain proteins</b>          |                             |              |                                                   |                                               |                                                |                              |                              |                               |                               |                               |                               |
| AT1G30440                                         | AT1G30440                   | 261796_at    | 5.24E-02                                          | 6.70E-01                                      | 2.68E-01                                       | -0.1160                      | -0.1403                      | -0.5560                       | 0.0665                        | -0.6548                       | 0.2536                        |
| AT1G52770                                         | AT1G52770                   | 260146_at    | 8.21E-05                                          | 1.25E-07                                      | 9.69E-01                                       | -0.6386                      | 0.6284                       | -0.6510                       | 3.3257                        | -0.6280                       | 3.4012                        |
| AT1G50280                                         | AT1G50280                   | 262464_at    | 7.81E-03                                          | 5.72E-03                                      | 4.60E-01                                       | 0.0280                       | 0.0261                       | -0.1846                       | 1.6325                        | -0.1719                       | 1.6348                        |
| RPT2                                              | At2g30510                   | 267517_at    | 1.79E-03                                          | 6.39E-01                                      | 3.08E-02                                       | -0.2003                      | -0.0562                      | -0.8914                       | 0.4487                        | -1.1562                       | 0.6242                        |
| RPT2                                              | At2g30520                   | 267516_at    | 4.02E-02                                          |                                               |                                                | 0.3203                       | -0.8113                      | -0.4336                       | 0.8247                        | -1.3741                       | 0.9188                        |
| AT2G47860                                         | AT2G47860                   | 266507_at    | 8.23E-01                                          | 6.86E-01                                      | 7.93E-01                                       | 0.3261                       | -0.0161                      | 0.1874                        | -0.1663                       | 0.2306                        | 0.0309                        |
| AT3G08570                                         | AT3G08570                   | 258672_at    | 1.58E-01                                          | 5.93E-01                                      | 3.44E-02                                       | 0.1232                       | -0.0111                      | 0.3174                        | -0.0271                       | 0.7033                        | -0.0055                       |
| AT3G49900                                         | AT3G49900                   | 252227_at    | 7.03E-01                                          | 6.13E-01                                      | 8.35E-01                                       | 0.2098                       | 0.2016                       | 0.1745                        | 0.1832                        | -0.0682                       | 0.2349                        |
| AT3G19850                                         | AT3G19850                   | 257964_at    | 4.22E-05                                          | 1.06E-01                                      | 2.27E-07                                       | 0.5945                       | 0.1165                       | -2.5562                       | 1.4999                        | -4.4263                       | 1.4226                        |
| AT3G22104                                         | AT3G22104                   | 257260_at    | 3.71E-01                                          | 7.57E-01                                      | 8.56E-01                                       | 0.0640                       | -0.0488                      | -0.1276                       | 0.1511                        | -0.0276                       | 0.0543                        |
| AT3G44820                                         | AT3G44820                   | 246331_at    | 1.10E-01                                          | 2.45E-01                                      | 8.84E-02                                       | -0.0974                      | -0.0228                      | -0.1557                       | -0.0080                       | -0.4345                       | -0.0904                       |
| AT3G15570                                         | AT3G15570                   | 257294_at    | 2.98E-05                                          | 7.43E-01                                      | 5.97E-06                                       | -0.1093                      | 0.2655                       | -1.9051                       | 1.0836                        | -3.8841                       | 0.6506                        |
| AT3G26490                                         | AT3G26490                   | 256872_at    | 5.82E-01                                          | 2.07E-01                                      | 2.17E-01                                       | 0.0148                       | -0.0173                      | -0.0771                       | 0.3329                        | 0.4144                        | 0.6708                        |
| ENP1/NPY1                                         | At4g31820                   | 253493_at    | 2.55E-02                                          | 4.17E-01                                      | 5.23E-02                                       | 0.0085                       | -0.1721                      | -0.5496                       | 0.6333                        | -0.9713                       | 0.8172                        |
| NPY5                                              | AT4G37590                   | 253062_at    | 1.12E-02                                          | 8.81E-01                                      | 5.45E-03                                       | 0.2631                       | -0.3577                      | 0.0474                        | 0.0215                        | -0.2834                       | -0.2929                       |
| NPY3                                              | AT5G67440                   | 246999_at    | 4.70E-02                                          | 9.19E-01                                      | 3.98E-03                                       | -0.0673                      | -0.4557                      | -0.9055                       | -0.3003                       | -1.0171                       | -0.1195                       |
| AT5G47800                                         | AT5G47800                   | 248772_at    | 1.73E-02                                          | 9.24E-01                                      | 2.42E-01                                       | 0.4968                       | 0.4290                       | 0.5834                        | 0.5706                        | -0.1281                       | 0.7932                        |
| NPH3                                              | At5g64330                   | 247288_at    | 2.28E-01                                          | 7.26E-01                                      | 4.58E-01                                       | 0.1821                       | -0.1226                      | 0.0536                        | 0.2180                        | 0.3748                        | 0.1794                        |
| AT5G66560                                         | AT5G66560                   | 247048_at    | 1.19E-01                                          | 8.35E-01                                      | 2.45E-01                                       | 0.2248                       | -0.0649                      | -0.1845                       | -0.4910                       | -0.4722                       | 0.0838                        |
| <b>AGC KINASE encoding genes</b>                  |                             |              |                                                   |                                               |                                                |                              |                              |                               |                               |                               |                               |
| WAG1                                              | AT1G51170                   | 265144_at    | 3.64E-01                                          | 8.01E-01                                      | 5.04E-01                                       | 0.3380                       | -0.0240                      | -0.0777                       | -0.1126                       | 0.1313                        | 0.0159                        |
| AT2G36350                                         | AT1g53700                   | 259961_at    | 1.54E-03                                          | 2.05E-05                                      | 4.25E-01                                       | 0.0983                       | -0.0096                      | -0.0042                       | 0.1766                        | -0.1187                       | 1.2985                        |
| AT2G44830                                         | AT2G36350                   | 263962_at    | 3.61E-01                                          | 4.67E-01                                      | 8.94E-01                                       | -0.3042                      | 0.3402                       | -0.0724                       | -0.1410                       | 0.0346                        | 0.5829                        |
| AT3G12690                                         | AT2G44830                   | 266812_at    | 4.92E-01                                          | 8.64E-01                                      | 2.69E-01                                       | 0.3920                       | 0.1858                       | 0.0829                        | 0.1234                        | -0.1323                       | 0.1880                        |
|                                                   | AT3G12690                   | 257696_at    | 5.10E-01                                          | 6.69E-01                                      | 8.05E-01                                       | 0.1571                       | 0.1836                       | 0.2107                        | 0.0101                        | 0.3645                        | 0.0969                        |

| Gene Title                         | Transcript ID(Array Design) | Probe Set ID | Corrected p-value(Time-Genotype)GR-REV | Corrected p-value(Time-Genotype)GR-REV | Corrected p-value(Time-Genotype)KAN1-GR | [0min, GRKAN] (normal GRREV] | [0min, GRKAN] (normal GRREV] | [30min, GRKAN] (normal GRREV] | [30min, GRKAN] (normal GRREV] | [60min, GRKAN] (normal GRREV] | [60min, GRKAN] (normal GRREV] |
|------------------------------------|-----------------------------|--------------|----------------------------------------|----------------------------------------|-----------------------------------------|------------------------------|------------------------------|-------------------------------|-------------------------------|-------------------------------|-------------------------------|
|                                    |                             |              | vs KAN1-GR                             | vs COL                                 | vs COL                                  | ized)                        | ized)                        | ized)                         | ized)                         | ized)                         | ized)                         |
| AT3G20830                          | AT3G20830                   | 257975_at    | 4.17E-01                               | 3.73E-01                               | 7.73E-01                                | 0.1995                       | -0.4459                      | -0.1100                       | -0.0536                       | 0.1421                        | -0.3763                       |
| AGC2-1                             | At3g25250                   | 257840_at    | 3.93E-01                               | 9.59E-01                               | 5.24E-01                                | 0.0078                       | -0.0182                      | 0.3191                        | 0.0056                        | 0.2313                        | -0.0198                       |
| WAG2                               | At3g14370                   | 258367_at    | 8.83E-03                               | 1.61E-01                               | 1.87E-01                                | 0.8853                       | -0.2164                      | -0.0924                       | 0.3638                        | 0.1152                        | 0.6939                        |
| ATPK7                              | At3g27580                   | 258029_at    | 8.14E-01                               | 6.55E-01                               | 2.43E-01                                | 0.1125                       | 0.5025                       | 0.2488                        | 0.6177                        | 0.6156                        | 0.8301                        |
| PHOT1                              | At3g45780                   | 252543_at    | 3.96E-03                               | 3.60E-02                               | 2.21E-01                                | 0.0325                       | -0.9598                      | -0.2189                       | -0.2175                       | -0.3078                       | -0.1643                       |
| AT3G44610                          | AT3G44610                   | 252646_at    | 4.56E-01                               | 9.02E-01                               | 4.94E-01                                | 0.1579                       | -0.1772                      | 0.5519                        | -0.1617                       | 0.4526                        | -0.1919                       |
| KIPK                               | At3g52890                   | 251994_at    | 6.51E-01                               | 6.94E-01                               | 9.53E-01                                | 0.2580                       | 0.2031                       | 0.1941                        | 0.3655                        | 0.3308                        | 0.5677                        |
| AT4G26610                          | AT4G26610                   | 253976_at    | 3.08E-01                               | 3.70E-01                               | 5.47E-01                                | -0.0632                      | 0.1990                       | -0.0229                       | -0.0632                       | -0.1601                       | 0.0792                        |
| PHOT2                              | At5g58140                   | 247853_at    | 7.42E-02                               | 6.45E-01                               | 8.23E-01                                | 0.2823                       | 0.2582                       | 0.5427                        | 0.1881                        | 0.6905                        | 0.1551                        |
| <b>TIR1 Auxin receptor gene</b>    |                             |              |                                        |                                        |                                         |                              |                              |                               |                               |                               |                               |
| TIR1                               | At3g62980                   | 251199_at    | 8.78E-02                               | 8.10E-01                               | 4.41E-01                                | -0.0497                      | 0.1352                       | 0.2281                        | -0.1253                       | 0.1975                        | -0.1154                       |
| <b>IAA protein coding genes</b>    |                             |              |                                        |                                        |                                         |                              |                              |                               |                               |                               |                               |
| IAA10                              | At1g04100                   | 264328_at    | 9.17E-01                               | 6.55E-01                               | 5.94E-01                                | 0.1427                       | 0.1337                       | -0.0130                       | -0.0769                       | 0.0576                        | 0.0920                        |
| BDL/IAA12                          | At1g04550                   | 264605_at    | 1.95E-01                               | 8.55E-01                               | 9.59E-01                                | 0.2067                       | 0.0823                       | 0.1988                        | 0.3639                        | 0.1712                        | 0.6136                        |
| SHY2/IAA3                          | At1g04240                   | 263656_at    | 3.57E-02                               | 8.84E-01                               | 2.10E-02                                | 0.0231                       | -0.4670                      | -0.8270                       | 0.0545                        | -1.0473                       | -0.1249                       |
| AXR3/IAA17                         | At1g04250                   | 263664_at    | 5.73E-01                               | 5.38E-01                               | 8.82E-01                                | 0.0310                       | -0.5721                      | -0.2121                       | -0.6577                       | -0.2376                       | -0.5513                       |
| IAA18                              | At1g51950                   | 246376_at    | 5.23E-02                               | 8.00E-01                               | 9.87E-02                                | -0.3177                      | -0.1175                      | -0.6971                       | -0.0749                       | -0.9123                       | 0.0185                        |
| IAA8                               | At2g22670                   | 265319_at    | 6.32E-01                               | 9.13E-01                               | 9.63E-01                                | 0.2723                       | -0.1269                      | 0.2671                        | -0.0072                       | 0.3197                        | -0.1232                       |
| IAA13                              | At2g33310                   | 255788_at    | 1.10E-02                               | 5.09E-02                               | 2.87E-01                                | 0.0207                       | -0.2669                      | -0.5216                       | -0.0993                       | -0.6244                       | 0.5680                        |
| IAA16                              | At3g04730                   | 258797_at    | 5.63E-02                               | 1.69E-01                               | 6.42E-01                                | -0.0978                      | -0.6153                      | -0.1858                       | -0.5105                       | -0.3079                       | -0.0510                       |
| IAA19                              | At3g15540                   | 258399_at    | 4.23E-01                               | 9.64E-01                               | 4.49E-01                                | 0.2183                       | -0.2099                      | 0.0998                        | -0.1750                       | -0.0807                       | 0.0003                        |
| IAA2                               | At3g23030                   | 257766_at    | 1.85E-01                               | 8.35E-01                               | 3.65E-01                                | -0.6442                      | -0.3616                      | -1.1198                       | 0.0889                        | -1.2216                       | -0.0726                       |
| IAA7                               | At3g23050                   | 257769_at    | 5.44E-02                               | 9.81E-01                               | 1.41E-01                                | 0.0697                       | -0.3769                      | -0.3159                       | -0.0702                       | -0.2680                       | -0.0053                       |
| IAA14                              | At4g14550                   | 245593_at    | 2.08E-01                               | 7.30E-01                               | 9.82E-01                                | -0.0959                      | -0.4847                      | -0.2435                       | -0.9137                       | -0.1563                       | -0.3299                       |
| IAA1                               | At4g14560                   | 245397_at    | 1.18E-01                               | 1.23E-01                               | 3.06E-02                                | 0.0757                       | -0.0638                      | -0.1399                       | -0.1999                       | -0.4601                       | 0.2333                        |
| PAP2/IAA27                         | At4g29080                   | 253749_at    | 3.30E-01                               | 7.62E-01                               | 6.34E-01                                | -0.0074                      | -0.3523                      | 0.1346                        | -0.4615                       | 0.2163                        | -0.5651                       |
| IAA11                              | At4g28640                   | 253791_at    | 2.20E-02                               | 9.96E-02                               | 3.42E-02                                | 0.0673                       | 0.0211                       | 0.6931                        | -0.1727                       | 0.9908                        | -0.3219                       |
| IAA28                              | At5g25890                   | 246861_at    | 2.98E-01                               | 8.81E-01                               | 7.77E-01                                | -0.3820                      | -0.7368                      | -0.8656                       | -0.4449                       | -0.3752                       | -0.5091                       |
| ATAUX2-11/IAA4                     | At5g43700                   | 249109_at    | 7.08E-01                               | 7.88E-01                               | 5.73E-01                                | -0.0413                      | -0.0465                      | -0.2066                       | -0.0099                       | -0.3207                       | -0.0858                       |
| IAA9                               | At5g65670                   | 247148_at    | 4.25E-01                               | 7.63E-01                               | 8.35E-01                                | -0.0258                      | 0.0089                       | 0.0742                        | -0.2066                       | 0.1832                        | -0.0682                       |
| <b>Auxin Response Factor genes</b> |                             |              |                                        |                                        |                                         |                              |                              |                               |                               |                               |                               |
| ARF19                              | At1g19220                   | 256010_at    | 7.01E-01                               | 7.51E-01                               | 8.88E-01                                | 0.1762                       | -0.0976                      | 0.1077                        | 0.0482                        | 0.0021                        | 0.0381                        |
| MP/ARF5                            | At1g19850                   | 255782_at    | 2.69E-01                               | 2.89E-01                               | 9.12E-01                                | 0.3153                       | 0.5389                       | 0.4002                        | 0.0178                        | 0.2044                        | 0.1089                        |
| ARF6                               | At1g30330                   | 256311_at    | 4.40E-01                               | 6.91E-02                               | 6.76E-01                                | 0.2501                       | 0.0579                       | 0.1611                        | 0.1150                        | 0.1032                        | -0.3268                       |
| ARF12                              | At1g34310                   | 262566_at    | 4.03E-01                               | 8.80E-01                               | 9.62E-01                                | 0.0861                       | 0.1587                       | 0.0846                        | -0.2172                       | 0.0703                        | 0.0071                        |
| ARF1                               | At1g59750                   | 262914_at    | 1.81E-01                               | 6.41E-01                               | 8.77E-01                                | -0.0025                      | -0.4024                      | -0.1054                       | 0.0304                        | -0.1689                       | -0.1216                       |
| ARF17                              | At1g77850                   | 262136_at    | 1.16E-01                               | 9.82E-01                               | 6.21E-01                                | -0.3101                      | 0.4030                       | -0.2243                       | 0.0413                        | -0.4592                       | 0.3957                        |
| ARF10                              | At2g28350                   | 265272_at    | 6.14E-02                               | 7.48E-02                               | 1.14E-04                                | 0.3780                       | -0.1455                      | 1.2363                        | 0.5780                        | 1.8560                        | 0.3911                        |
| ARF11                              | At2g46530                   | 265454_at    | 3.83E-01                               | 5.10E-01                               | 6.60E-01                                | 0.0777                       | -0.0071                      | 0.0566                        | -0.3777                       | -0.0258                       | 0.2381                        |
| ETT/ARF3                           | At2g33860                   | 267452_at    | 3.08E-02                               | 3.45E-02                               | 4.48E-01                                | -0.0539                      | -0.5726                      | 0.1443                        | -0.3306                       | -0.0053                       | 0.1657                        |
| ARF18                              | At3g61830                   | 251289_at    | 2.31E-01                               | 9.67E-01                               | 7.16E-01                                | 0.2843                       | 0.4201                       | 0.5603                        | 0.3375                        | 0.7802                        | 0.2191                        |
| ARF16                              | At4g30080                   | 253662_at    | 5.18E-01                               | 9.72E-01                               | 7.89E-01                                | 0.0039                       | -0.3530                      | 0.0550                        | -0.4597                       | 0.5012                        | -0.2403                       |
| ARF9                               | At4g23980                   | 254194_at    | 2.70E-01                               | 2.62E-01                               | 9.66E-01                                | 0.1328                       | -0.5181                      | -0.1033                       | -0.4119                       | 0.0485                        | -0.7721                       |
| NPH4/ARF7                          | At5g20730                   | 245971_at    | 7.39E-01                               | 3.74E-01                               | 4.27E-01                                | 0.3258                       | 0.0331                       | 0.0198                        | 0.0024                        | 0.0757                        | -0.1631                       |
| ARF8                               | At5g37020                   | 249651_at    | 9.00E-01                               | 6.42E-01                               | 9.68E-01                                | 0.4158                       | 0.0856                       | 0.6122                        | 0.1071                        | 0.6936                        | 0.2882                        |
| ARF2                               | At5g62000                   | 247508_at    | 1.10E-01                               | 9.34E-01                               | 3.82E-01                                | 1.0147                       | -2.1363                      | 0.8950                        | 1.0372                        | 0.3372                        | 1.0751                        |
| ARF2                               | At5g62010                   | 247468_at    | 5.82E-01                               |                                        |                                         | 0.1158                       | -0.1651                      | 0.2248                        | 0.0375                        | 0.2435                        | -0.1632                       |
| ARF4                               | At5g60450                   | 247643_at    | 6.88E-01                               | 3.60E-01                               | 3.20E-01                                | 0.2567                       | -0.1409                      | 0.1152                        | -0.0110                       | -0.1490                       | -0.4370                       |

Degree of yellow shading indicates values that are statistically significant at varying levels.

Supplemental Table 3: Oligonucleotide sequences

**Primers for Oligonucleotide Selection and EMSA**

| Oligo Name           | Sequence (forward strand)                                          |
|----------------------|--------------------------------------------------------------------|
| BSSlong              | gctgagctctgaacaagcttgNNNNNNNNNNNNNNNNNNcctcgagtcagagcgctc          |
| BSSr                 | cgacgctctgactcgagg                                                 |
| BSSf                 | gctgagctctgaacaagcttg                                              |
| GS13                 | gctgagctctgaacaagcttg <b>GGAATA</b> AAAAACGTGCCcctcgagtcagagcgctc  |
| GS15                 | gctgagctctgaacaagcttg <b>GcAATA</b> AAAAACGTGCCcctcgagtcagagcgctc  |
| GS17                 | gctgagctctgaacaagcttg <b>GGtATA</b> AAAAACGTGCCcctcgagtcagagcgctc  |
| GS18                 | gctgagctctgaacaagcttg <b>GGAt</b> AAAAACGTGCCcctcgagtcagagcgctc    |
| GS19                 | gctgagctctgaacaagcttg <b>GGAa</b> AAAAACGTGCCcctcgagtcagagcgctc    |
| GS20                 | gctgagctctgaacaagcttg <b>GGAAT</b> tAAAAACGTGCCcctcgagtcagagcgctc  |
| GS28                 | gctgagctctgaacaagcttg <b>GGAATg</b> AAAAACGTGCCcctcgagtcagagcgctc  |
| GS21                 | gctgagctctgaacaagcttg <b>GGAATATTC</b> ACGTGCCcctcgagtcagagcgctc   |
| GS35 (ARR10 binding) | gctgagctctgaacaagcttg <b>CAATCT</b> AAAAACGTGCCcctcgagtcagagcgctc  |
| GS14                 | gctgagctctgaacaagcttg <b>GtAATA</b> AAAAACGTGCCcctcgagtcagagcgctc  |
| GS16                 | gctgagctctgaacaagcttg <b>GaAATA</b> AAAAACGTGCCcctcgagtcagagcgctc  |
| GS29                 | gctgagctctgaacaagcttg <b>GGAATAc</b> AAAAACGTGCCcctcgagtcagagcgctc |
| GS32                 | gctgagctctgaacaagcttg <b>GGAATc</b> AAAAACGTGCCcctcgagtcagagcgctc  |
| GS33                 | gctgagctctgaacaagcttg <b>GGAATg</b> AAAAACGTGCCcctcgagtcagagcgctc  |

**Primers for RT-PCR**

| Gene      | forward                    | reverse                    |
|-----------|----------------------------|----------------------------|
| At1g02400 | gttctcgagaacattctgacctca   | gccgacatacgtggcttctttg     |
| At1g04240 | gaggctgggattaccgggaaca     | catccaacaatctgagccttctgag  |
| At1g11210 | aggagccggagggtgtgtatgaa    | caacggaagcgttgacttgttc     |
| At1g17990 | tcccgcattgtcaacgactttag    | tgcaaatggcgagagctgtattcc   |
| At1g18400 | tgcccggatgttataaggctatgg   | ctgcatggaactcaactgcatctgtc |
| At1g21830 | cagcctcctaagatattgccttg    | ttgcgcatctaaagcagatgact    |
| At1g21910 | cctacttcatcagccgtctcgt     | catcgagcatcgctcgtcagat     |
| At1g22570 | cgtygtcgggaactgcctctatac   | gacctctcgttattacctctctc    |
| At1g23480 | ccctgagctccaagtctcaaatgg   | cgctctgctctagtaaccgatg     |
| At1g24530 | atcttctcactcagcgagtaacc    | acggcgagacaagttacaggaagac  |
| At1g25550 | tcaccggagttacaccgcagattc   | actgccgttgggtgatttacc      |
| At1g35350 | ccgcttcttctctcatggttcta    | agtgttgcctctgcttgaagtc     |
| At1g51805 | ggagagtcacgtgtgttcggtgc    | ggtgtcacggtcacggttaagtg    |
| At1g52290 | accgcggttagagaatgattttg    | ttcgatctcctgctgtacggtg     |
| At1g53870 | cggagcaagagaggttacgatt     | cttgattgcaaaaactgatccacga  |
| At1g76520 | gcactgtgatcgggctcattactc   | gcaaccaagacgccgataaactgg   |
| At2g01420 | ccggtacgggtgttcaactaaacc   | ggcggcatatgtgtccggtgt      |
| At2g21650 | gcacaatgtgctagagctgttg     | ttgcttctgtcactcagctt       |
| At2g39380 | agatgaacacaacaaccacgag     | ttgacgctagcttctgagtttg     |
| At3g04210 | tgctgaatgagttggactga       | ccatccaactaagtcgctgaaatc   |
| At3g06070 | tctcttccagggtttgtcagagg    | gggataaaggaaccgatgaatctc   |
| At3g19850 | ggggttacgatgtgatttggtga    | tcctcgatgatagttcggaatgag   |
| At3g22420 | gacgtgtaggctaacggcattgg    | gccgtctcaaacggaagtaaatg    |
| At3g23030 | gcaatgctgtacgaaagtcaac     | gtcaaaactccgatccgaataaac   |
| At4g17460 | tccgcagttctgaagacactttc    | ccgccgattctctccgtaatttc    |
| At4g18010 | ttatggattgccgaagatttggtg   | ttgtggccggaagtaaggtgag     |
| At4g30270 | aaccgcaatttccacttactca     | cctcatcgcttcttcttgaaac     |
| At5g02760 | gaatcagggccgcttacattcaac   | cctaccctcgagcgaacttct      |
| At5g11000 | atccagaagcagaggaggtttgtg   | cgaaatcgaagacgacgaagaact   |
| At5g14120 | ccgagctcgtgtcagggacta      | gggcatccgtacgaaagaatag     |
| At5g20250 | gcgattgttgtcgtgatcct       | ctcgtgtcacggattttgagtg     |
| At5g28770 | tcactggtcgggttaatggaatgacg | tgctcatattggtgtagctttgga   |
| At5g46330 | ctcacgtaagcgaatttggaaactgc | ctcacgtaagcgaatttggaaactgc |
| At5g47370 | agactccatggaacaaacattcg    | cttctccgctaagtgtgcttga     |
| At5g59080 | aaacatggctcacaagctcaacgta  | gggttctgtcattagcgtcgtc     |
| At5g61590 | tgatattgatgctgaaggccta     | ttgttctcctgaggctgtgta      |

**Primers for RT-PCR**

| Gene           | forward                    | reverse                    |
|----------------|----------------------------|----------------------------|
| At5g62280      | ggtctgctgagaatgctactaaagc  | gcgattagtcaacgagtatgtcg    |
| At5g62570      | tgaaagcatctagcaggcatca     | cacgggaagcgatagattgttcaag  |
| ubc/At5g25760  | ctgagccggacagtcctctaactg   | cggcgaggcgtgtatacatttgtg   |
| act2/At3g18780 | tggtcgtacaaccggtattgtgctgg | tgtctcttacaatttcccgtctgctg |
| NPY1/ENP       | gcttctaaagctgctcagggtca    | tcgcctcaaaaaccagtcgctgc    |
| NPY2           | ccccagaccagcacatgatgca     | gcagctgcgtagctccctcc       |
| NPY3           | cacgatgggtgtatcgtgcca      | cacggcgtgagcacaagcct       |
| NPY4           | tccaagacactctcacgacgtg     | tggtcacacgcttccgcggat      |
| NPY5           | acttgcggaaatggtctcgagct    | gtttgaaccgctgagcgca        |
| WAG1           | accgaaaaatggaagacgacgg     | tgagtggtgtgcccggga         |
| WAG2           | aggctaggatgcccagggg        | cgtagacagcctaaacgctg       |
| PID            | acctaccggcgatttccct        | tcgtcgggtgaacggagtg        |
| PID2           | gcctccgcaaccgtctaaacg      | ggtcacggtcgttgcgtgag       |

**Primers for Chromatin Immunoprecipitation**

| Gene                    | left primer                | right primer               |
|-------------------------|----------------------------|----------------------------|
| <i>RPL4D/At5g02870</i>  | tggtttgtcattactgtgctatgc   | ataaagctggcggttcgagt       |
| <i>IAA2/At3g23030</i>   | cgggtcgccgatagaat          | tcggaagcatgaaaggcaag       |
| <i>PIN4/At2g01420</i>   | aacggccaacagtggttg         | gtttctggagggacgtgga        |
| <i>FLS2/At5g46330</i>   | cgctcaaaactaaatcgga        | agggatcatgtcacggatgt       |
| <i>HAT2a/At5g47370</i>  | ttggccatctattgttttga       | tggaatgaagaagagaggggatt    |
| <i>HAT2b/At5g47370</i>  | tgtttgtaccaaccactccaatta   | tggaatgaagaagagaggggatt    |
| <i>GA2ox6/At1g02400</i> | ggttaggcaagaatgttgacaataaa | catcctacaaatcgctgaagggtg   |
| <i>BEE1/At1g18400</i>   | gcattggccatttgaagtt        | tggtcgtgggttccattagg       |
| <i>RSM1/At2g21650</i>   | ttgatatggtttcatggcagaga    | acgtgctcgcgaaaattac        |
| At1g17990               | gaaatgggtgagacagagatgat    | aagacgtgcacaaatgcttaaggt   |
| At1g25550               | tttctggtacatatctgattccaa   | cggatttacttggaaagggtag     |
| At3g06070               | ttttaatggatgcaaatgcaaat    | ggaattcctaactacctatccaatga |
| At5g28770               | cgttgtaactgtaggcaatctca    | taatggccccgacaagagtc       |
| At5g61590               | caagacaaccctacaagacaagca   | cacaaacaaaacaaaagacttg     |

**Other Primers**

|      |                                      |
|------|--------------------------------------|
| UASf | CTTctaggcaattgGTCGGAGTACTGTCCTCC     |
| UASr | TCCcctagggaaattcGTCGTCCTCTCCAAATGAAA |
| KBdf | ATTCggatCcAAGATGCCGACAAAGCGAAGC      |
| KBDr | AAGCgaattcCTTGTTAGTGGTCTTAACAGTTCG   |

## Supplemental Data References

**Bogre, L., Ökrész, L., Henriques, R., and Anthony, R.J.** (2003). Growth signalling pathways in *Arabidopsis* and the AGC protein kinases. *Trends in Plant Science* **8**, 424-431.

**Reinhart, B.J., Liu, T., Newell, N.R., Magnani, E., Huang, T., Kerstetter, R., Michaels, S. and Barton, M.K.** (2013). Establishing a Framework for the Ad/Abaxial Regulatory Network of Arabidopsis – ascertaining targets of HD-ZIPIII and KANADI regulation. *Plant Cell* **25**, 3228-3249.
